# Supplementary material for: AXIN2 Reduces the Survival of Porcine Induced Pluripotent Stem Cells (piPSCs)
Source: MDPI journal article supplement (doi:10.3390/ijms222312954), 2021-11-30
Supplement: s1 [file s1]

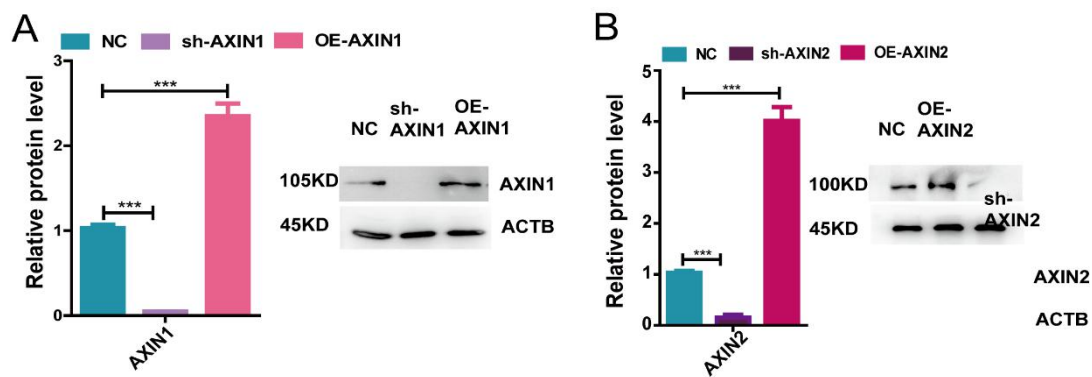

**Supplementary Figure S1.** Western blotting analysis of AXIN1 and AXIN2.

A, Western blot analysis of AXIN1 in the NC, sh-AXIN1 and OE-AXIN1 groups; B Western blot analysis of AXIN2 in the NC, sh-AXIN2, and OE-AXIN2 groups; \*\*\* represent  $P < 0.0001$ .

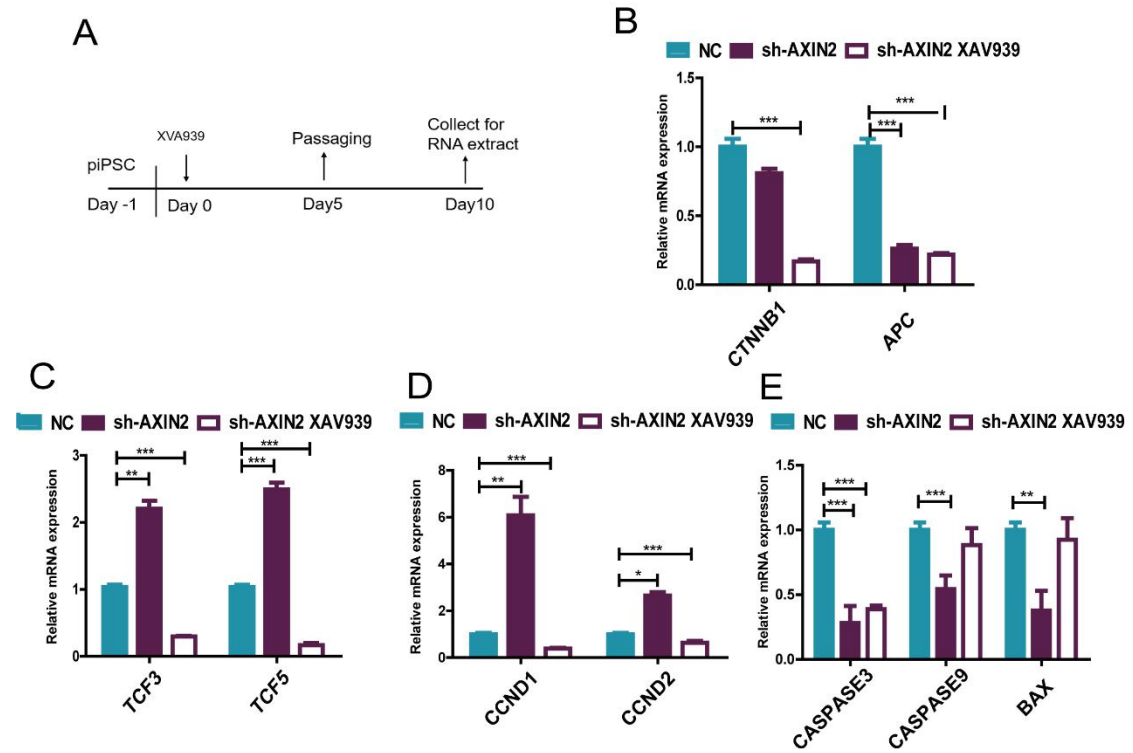

**Supplementary Figure S2.** CTNNB1 regulated the proliferation of piPSCs. A, A schematic illustration of the experiment; B, qPCR analysis of the expression levels of *CTNNB1* and *APC* in the control (NC), knockdown AXIN2(sh-AXIN2) and knockdown AXIN2 with XAV939 (sh-AXIN2 XAV939) groups; C, qPCR analysis of the expression levels of *TCF3*, *TCF5* in NC, sh-AXIN2 and sh-AXIN2 XAV939 groups; D, qPCR analysis of the expression levels of *CCND1*, *CCND2* in NC, sh-AXIN2 and sh-AXIN2 XAV939 groups; E, qPCR analysis of the expression levels of *CASPASE3*, *CASPASE9* and *BAX* in NC, sh-AXIN2 and sh-AXIN2 XAV939 groups; \* represent  $P < 0.05$ ; \*\* represent  $P < 0.01$ ; \*\*\* represent  $P < 0.0001$ .
